# Supplementary material for: Lettuce Chlorosis Virus Disease: A New Threat to Cannabis Production
Source: MDPI journal article supplement (doi:10.3390/v11090802), 2019-08-29
Supplement: s1 [file s1]

**Table S1.** Primer pairs used for sequencing cannabis lettuce chlorosis virus (LCV) isolate.

| Set No. | *Orientation | Name-position | Sequence (5'-3')          |
|---------|--------------|---------------|---------------------------|
| 1       | F            | RNA1-F-68     | CCTTAATGGCCGTGATGTCCG     |
| 1       | R            | RNA1-R-1572   | ATCAGGCACACAGACTCGAA      |
| 2       | F            | RNA1-F-4587   | ACAATTCTCTATGCTCAAACCGT   |
| 2       | R            | RNA1-R-5941   | GTGATCACTGACAAGATGTTCCGA  |
| 3       | F            | RNA2-F-2238   | GTCTCGGTCCCAGCGGATTA      |
| 3       | R            | RNA2-R-2954   | TGTCAGTTTCTTTTGTAACCCCT   |
| 4       | F            | RNA2-F-5107   | TCGTACACTCCGTCTGATGA      |
| 4       | R            | RNA2-R-5925   | CACTCTGCAGATCAAAGGGC      |
| 5       | F            | RNA1-F-1900   | TGTTCAACAGTTGTAGACCT      |
| 5       | R            | RNA1-R-2695   | TATGGATTGCGCCTGAGAGA      |
| 6       | F            | RNA1-F-2756   | ACACTCCATCTCTTTTCGGT      |
| 6       | R            | RNA1-R-4258   | AGGTCTGTATGTGTGAAAGCA     |
| 7       | F            | RNA1-F-5473   | CGGGTTGCTCACACAGTTTG      |
| 7       | R            | RNA1-R-6687   | TTGTGAATCTCTTCTACTCCC     |
| 8       | F            | RNA1-F-7170   | TCACAGCCGAGATCAACAGA      |
| 8       | R            | RNA1-R-8433   | GTTACCAGCCTTGAGTCAATCA    |
| 9       | F            | RNA2-F-949    | ACTTTAAACTGTGTCGCCGT      |
| 9       | R            | RNA2-R-2011   | ACGATCTTAAAAGATGGGTTGG    |
| 10      | F            | RNA2-F-2892   | CATGCTCAAGAAGACACGGG      |
| 10      | R            | RNA2-R-4250   | TTCAGAGAATGTGTGGAAGC      |
| 11      | F            | RNA2-F-4368   | AGAGTCCAGAGATCAAAGTAGT    |
| 11      | R            | RNA2-R-5828   | CTGCTGATGAGTTCTTGCCA      |
| 12      | F            | RNA2-F-6090   | TCATCTTCAGGCCAAACACGG     |
| 12      | R            | RNA2-R-7094   | TCCACCTAATCCGATTCCAC      |
| 13      | F            | RNA2-F-7628   | GCAGGTCATGACGTCAGATTT     |
| 13      | R            | RNA2-R-8189   | TGAACAATCACTACAGGTTTGG    |
| 14      | F            | RNA1-F-1263   | GTTTGGGTCCTGTGGCAATT      |
| 14      | R            | RNA1-R-2695   | TATGGATTGCGCCTGAGAGA      |
| 15      | F            | RNA1-F-2376   | AGACATGATGAACGGGAGCT      |
| 15      | R            | RNA1-R-4258   | AGGTCTGTATGTGTGAAAGCA     |
| 16      | F            | RNA1-F-3987   | TGGAATTGTGACAGCTCCCA      |
| 16      | R            | RNA1-R-5941   | GTGATCACTGACAAGATGTTCCGA  |
| 17      | F            | RNA1-F-6473   | CCAGTTGTGCCCGATTTGAA      |
| 17      | R            | RNA1-R-8433   | GTTACCAGCCTTGAGTCAATCA    |
| 18      | F            | RNA2-F-1770   | GAACCCCTCTAATCCCCCTCC     |
| 18      | R            | RNA2-R-2954   | TGTCAGTTTCTTTTGTAACCCCT   |
| 19      | F            | RNA2-F-2593   | ATTCAAGTGGCAGGGAGTCA      |
| 19      | R            | RNA2-R-4250   | TTCAGAGAATGTGTGGAAGC      |
| 20      | F            | RNA2-F-3937   | TCAACCGGGATCTCTGTTCA      |
| 20      | R            | RNA2-R-5828   | CTGCTGATGAGTTCTTGCCA      |
| 21      | F            | RNA2-F-5613   | CGTAACAAGAGAAAGCGAGGG     |
| 21      | R            | RNA2-R-7094   | TCCACCTAATCCGATTCCAC      |
| 22      | F            | RNA2-F-6784   | GCGTGTTCCAAAGCATCTCA      |
| 22      | R            | RNA2-R-8189   | TGAACAATCACTACAGGTTTGG    |
| RACE 5' | R            | RNA1-R-312    | GGTAGCCTTTAGAAGAAGGC      |
| RACE 5' | R            | RNA2-R-250    | CTGAACTGGTGTCAACGATCATGCG |
| RACE 3' | F            | RNA1-F-7882   | CAATTTAAAAACCGGTCAAG      |
| RACE 3' | F            | RNA2-F-8220   | TCAAGCAGACTTCTCAATCA      |

\*F=forward, C=complement

**Table S2.** Overlapping primer pairs used for sequencing cannabis lettuce chlorosis virus (LCV) isolate.

| Primer set No. | *Orientation | Name-position | Sequence (5'-3')        |
|----------------|--------------|---------------|-------------------------|
| 1              | F            | RNA1-F-1      | TGAAATCAAACCTTCCTTCGTA  |
| 1              | C            | RNA1-R-1572   | ATCAGGCACACAGACTCGAA    |
| 2              | F            | RNA1-F-1263   | GTTTGGGTCCTGTGGCAATT    |
| 2              | C            | RNA1-R-2695   | TATGGATTGCGCCTGAGAGA    |
| 3              | F            | RNA1-F-2376   | AGACATGATGAACGGGAGCT    |
| 3              | C            | RNA1-R-4258   | AGGTCTGTATGTGTGAAAGCA   |
| 4              | F            | RNA1-F-3987   | TGGAATTGTGACAGCTCCCA    |
| 4              | C            | RNA1-R-5941   | GTGATCACTGACAAGATGTTCGA |
| 5              | F            | RNA1-F-5473   | CGGGTTGCTCACACAGTTTG    |
| 5              | C            | RNA1-R-6687   | TTGTGAATCTCTTCTACTCCC   |
| 6              | F            | RNA1-F-6473   | CCAGTTGTGCCCCGATTTGAA   |
| 6              | C            | RNA1-R-3'End  | GTTAATAGAATAACTAGGCC    |
| 7              | F            | RNA2-F-1      | TGAAATTTTCCACGGTTTCCC   |
| 7              | C            | RNA2-R-2011   | ACGATCTTAAAAGATGGGTTGG  |
| 8              | F            | RNA2-F-1770   | GAACCCCTCTAATCCCTCC     |
| 8              | C            | RNA2-R-2954   | TGTCAGTTTCTTTTGTAAACCCT |
| 9              | F            | RNA2-F-2892   | CATGCTCAAGAAGACACGGG    |
| 9              | C            | RNA2-R-4250   | TTCAGAGAATGTGTGGAAGC    |
| 10             | F            | RNA2-F-3937   | TCAACCGGGATCTCTGTTCA    |
| 10             | C            | RNA2-R-5925   | CACTCTGCAGATCAAAGGGC    |
| 11             | F            | RNA2-F-5613   | CGTAACAAGAGAAAGCGAGGG   |
| 11             | C            | RNA2-R-7094   | TCCACCTAATCCGATTCCAC    |
| 12             | F            | RNA2-F-6784   | GCGTGTTCCAAAGCATCTCA    |
| 12             | C            | RNA2-R-3'End  | GTTAATAGAATAACTAGGCC    |

\*F=forward, C=complement

**Figure S1**

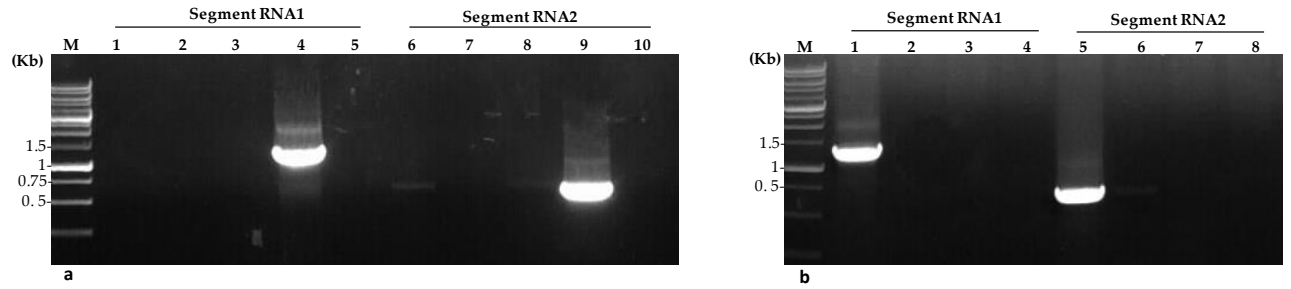

**Figure S1** Analysis of cannabis lettuce chlorosis virus (LCV-Can) seed transmission.

**(a)** LCV-Can in seeds of symptomatic cannabis plants. Lanes 1-5, RT-PCR with primer set No. 8, (Table S1). Lanes 6-10, RT-PCR with primer set No. 13 (Table S1). Lanes 4,9- symptomatic cannabis plants. Lanes 1-3, 6-8-seeds of symptomatic cannabis plants,100 seeds in each lane. Lanes 5,10- no template control (NTC). **(b)** LCV-Can seed to seedling transmission. Lanes 1-4, RT-PCR with primer set No. 8, (Table S1). Lanes 5-8, RT-PCR with primer set No. 13 (Table S1). Lanes 1,5- symptomatic cannabis plants. Lanes 2,6- pooled 10 seeds of the symptomatic plant. Lanes 3,7- pooled 8 seedlings of the sown seeds from the symptomatic plant. Lanes 4,8- no template control (NTC).
